# Supplementary material
Source: PubMed Central journal article supplement (PMC2722440)
Supplement: NIHMS101593-supplement-supplement_tab.pdf [file NIHMS101593-supplement-supplement_tab.pdf]

Supplementary Table I. Inflammatory mediator production by THP-1 cells induced by 20 hours of *N. gonorrhoeae* exposure (multiplicity of infection: 4).

| <b>Cytokine</b> | <b>fold induction</b> |
|-----------------|-----------------------|
| MIP-3 $\alpha$  | 115.3                 |
| MCP-2           | 54.0                  |
| MIP-1 $\beta$   | 46.0                  |
| MMP-9           | 38.6                  |
| MIP-1 $\alpha$  | 21.2                  |
| I-309           | 20.4                  |
| IL-1 $\beta$    | 11.7                  |
| ACTIVIN A       | 10.9                  |
| MMP-13          | 9.4                   |
| IP-10           | 9.3                   |
| MMP-1           | 9.2                   |
| GM-CSF          | 9.1                   |
| STNFR2          | 8.2                   |
| GCP-2           | 7.9                   |
| MIG             | 7.5                   |
| MCP-3           | 7.4                   |
| IL-10           | 7.2                   |
| IL-15           | 7.0                   |
| GRO             | 6.1                   |
| CD14            | 5.6                   |
| ONCOSTATIN M    | 5.4                   |
| IL-7            | 5.3                   |
| IL-5            | 5.0                   |
| UPAR            | 4.8                   |
| TGF-Beta1       | 4.7                   |
| IL-2            | 4.3                   |
| TNF- $\alpha$   | 4.1                   |
| BLC             | 3.8                   |
| NAP-2           | 3.7                   |
| IL-1 $\alpha$   | 3.4                   |
| IL-6            | 3.2                   |
| TGF- $\alpha$   | 3.1                   |
| TNF- $\beta$    | 2.9                   |
| MCP-4           | 2.6                   |
| GRO- $\alpha$   | 2.4                   |
| IL-8            | 2.3                   |
| PDGF AA         | 2.2                   |
| ENA-78          | 2.2                   |
| IL-13           | 2.1                   |
| IFN-G           | 2.0                   |
| MDC             | 2.0                   |
| IGFBP-4         | 1.9                   |

|                    |     |
|--------------------|-----|
| LAP                | 1.8 |
| SCF R              | 1.8 |
| IGFBP-2            | 1.8 |
| IGFBP-1            | 1.8 |
| PDGF R $\alpha$    | 1.8 |
| HCC-4              | 1.7 |
| BMP-6              | 1.7 |
| M-CSF R            | 1.7 |
| PARC               | 1.7 |
| ICAM-3             | 1.6 |
| ANGIOGENIN         | 1.6 |
| VEGF R2            | 1.6 |
| NGF R              | 1.6 |
| BTC                | 1.5 |
| TGF $\beta$ 2      | 1.5 |
| NT-3               | 1.5 |
| IL-1R2             | 1.5 |
| PDGF-AB            | 1.5 |
| SIGLEC-5           | 1.5 |
| ENDOGLIN           | 1.4 |
| L-SELECTIN         | 1.4 |
| IL-18 R $\beta$    | 1.4 |
| I-TAC              | 1.4 |
| IL-9               | 1.4 |
| CXCL-16            | 1.4 |
| DR6 (TNFRSF2-1)    | 1.4 |
| IL-13 R $\alpha$ 2 | 1.4 |
| VE-CADHERIN        | 1.4 |
| IL-16              | 1.3 |
| IGF-1              | 1.3 |
| VEGF R3            | 1.3 |
| B7-1 (CD80)        | 1.3 |
| MSP- $\alpha$      | 1.3 |
| FGF-7              | 1.3 |
| IL-10 R $\beta$    | 1.3 |
| VEGF               | 1.3 |
| IL-21R             | 1.3 |
| PROLACTIN          | 1.3 |
| FAS LIGAND         | 1.3 |
| IL-12 P70          | 1.3 |
| BNGF               | 1.3 |
| TIMP-4             | 1.3 |
| IL-2 R $\beta$     | 1.3 |
| STNFR1             | 1.3 |
| AGRP               | 1.3 |
| EGF-R              | 1.3 |

|                   |     |
|-------------------|-----|
| CARDIOTROPHIN-1   | 1.3 |
| E-SELECTIN        | 1.3 |
| CK B 8-1          | 1.3 |
| MPIF-1            | 1.3 |
| NT-4              | 1.3 |
| SGP130            | 1.3 |
| PDGF-BB           | 1.3 |
| IL-1RA            | 1.3 |
| TIE-2             | 1.2 |
| ICAM-1            | 1.2 |
| MIP-3 $\beta$     | 1.2 |
| FIT-3 LIGAND      | 1.2 |
| TIMP-2            | 1.2 |
| IL-3              | 1.2 |
| MCP-1             | 1.2 |
| DTK               | 1.2 |
| IL-1 R1           | 1.2 |
| 1.2               |     |
| IL-5 R $\alpha$   | 1.2 |
| SDF-1 $\beta$     | 1.2 |
| IL-18 BP $\alpha$ | 1.2 |
| AMPHIREGULIN      | 1.2 |
| PECAM-1           | 1.2 |
| HGF               | 1.2 |
| ERBB3             | 1.2 |
| LYMPHOTACTIN      | 1.2 |
| BMP-4             | 1.2 |
| IGF-2             | 1.2 |
| MIP-1 $\delta$    | 1.1 |
| LIGHT             | 1.1 |
| IL-17             | 1.1 |
| IL-11             | 1.1 |
| FGF-4             | 1.1 |
| IL-2 R $\alpha$   | 1.1 |
| TIE-1             | 1.1 |
| IGF-1 SR          | 1.1 |
| TRAIL R3          | 1.1 |
| EOTAXIN-3         | 1.1 |
| GCSF              | 1.1 |
| ANGIOPOIETIN-2    | 1.1 |
| ICAM-2            | 1.1 |
| TRAIL R4          | 1.1 |
| FAS/TNFRSF6       | 1.1 |
| BFGF              | 1.1 |
| IL-12 P40         | 1.1 |
| IGFBP-3           | 1.1 |

|                 |     |
|-----------------|-----|
| FGF-9           | 1.1 |
| LEPTIN R        | 1.1 |
| ALCAM           | 1.0 |
| IGFBP-6         | 1.0 |
| BDNF            | 1.0 |
| IL-2 R $\alpha$ | 1.0 |
| GITR            | 1.0 |
| ACRP30          | 1.0 |
| THROMPOPOIETIN  | 1.0 |
| PIGF            | 1.0 |
| RANTES          | 1.0 |
| M-CSF           | 1.0 |
| AXL             | 1.0 |
| CNTF            | 1.0 |
| CTACK           | 1.0 |
| TECK            | 1.0 |
| IL-1 R4/ST2     | 1.0 |
| EOTAXIN         | 1.0 |
| TIMP-1          | 1.0 |
| MIF             | 0.9 |
| GDNF            | 0.9 |
| IL-6 R          | 0.9 |
| FRACTALKINE     | 0.9 |
| VEGF-D          | 0.9 |
| TARC            | 0.9 |
| EOTAXIN-2       | 0.9 |
| GITR-LIGAND     | 0.8 |
| FGF-6           | 0.8 |
| BMP-7           | 0.8 |
| LEPTIN          | 0.5 |
