# Supplementary material
Source: PubMed Central journal article supplement (PMC2722440)

supplemental figure 1

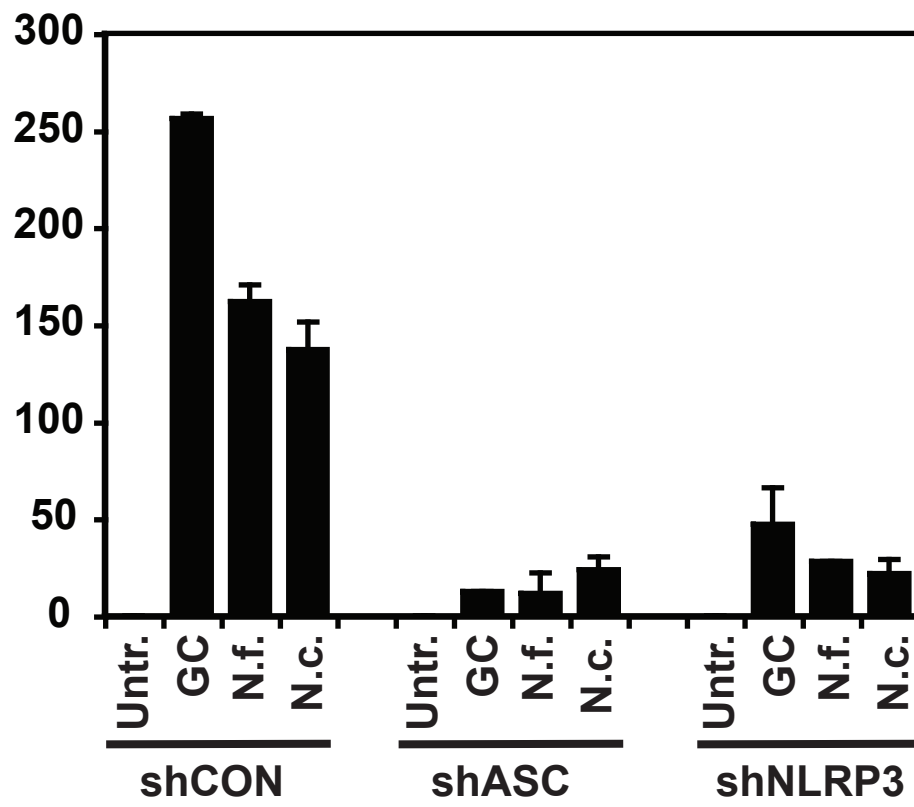

Supplement: NIHMS101593-supplement-supfig1.pdf [file NIHMS101593-supplement-supfig1.pdf]

supplemental figure 2

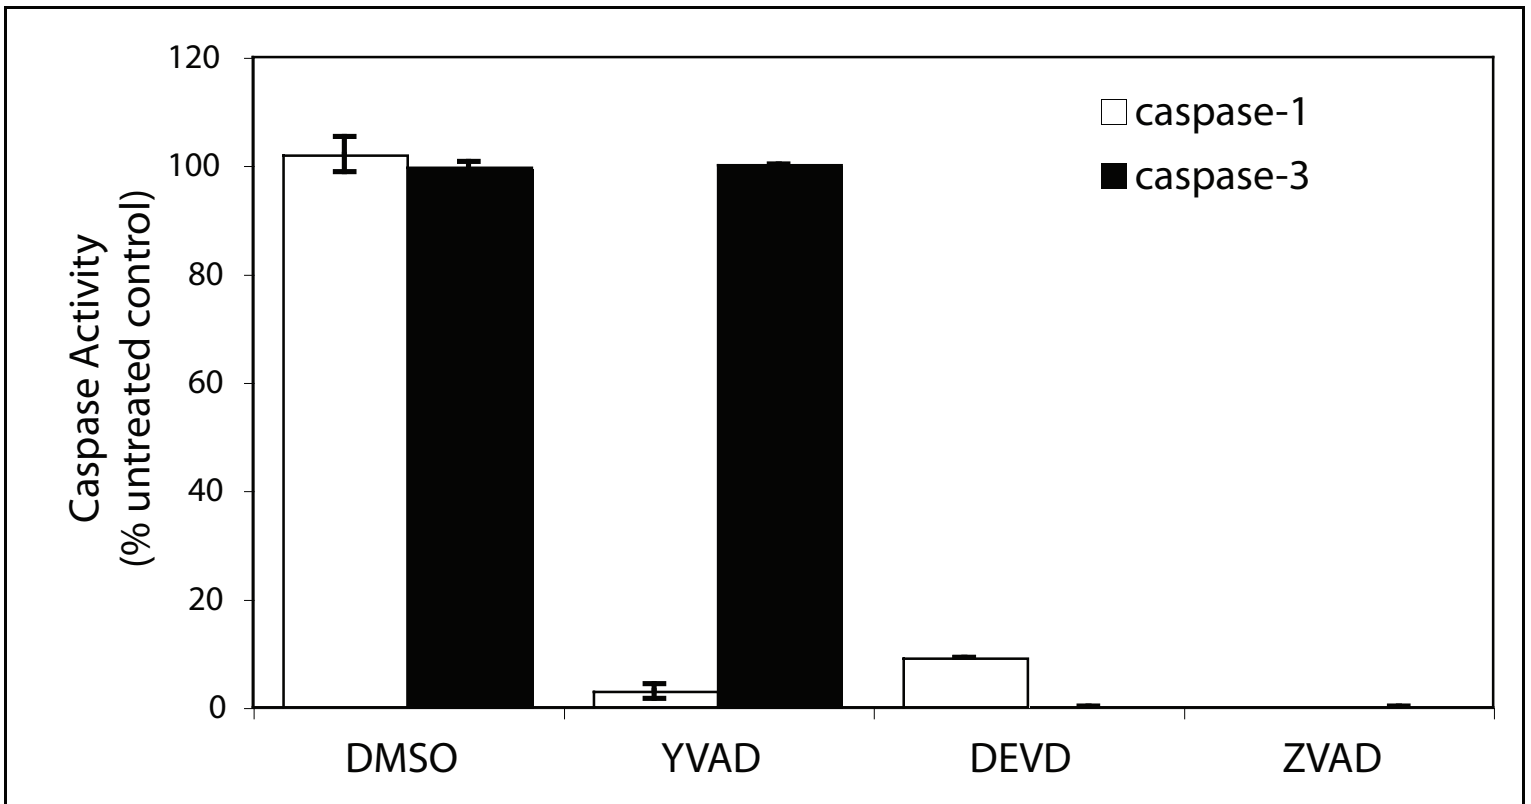

Supplement: NIHMS101593-supplement-supfig2.pdf [file NIHMS101593-supplement-supfig2.pdf]

supplemental figure 3

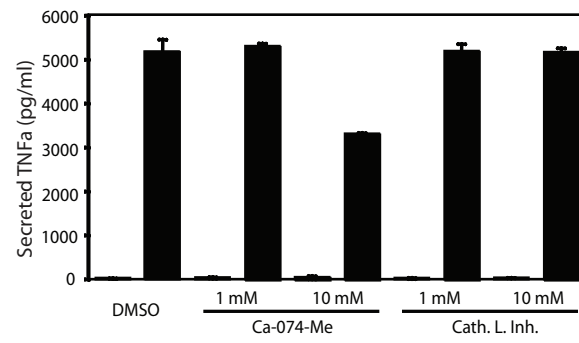

Supplement: NIHMS101593-supplement-supfig3.pdf [file NIHMS101593-supplement-supfig3.pdf]
